# Supplementary material
Source: PubMed Central journal article supplement (PMC4309686)
Supplement: AEM.03000-14_zam999116040so1.pdf [file AEM.03000-14_zam999116040so1.pdf]

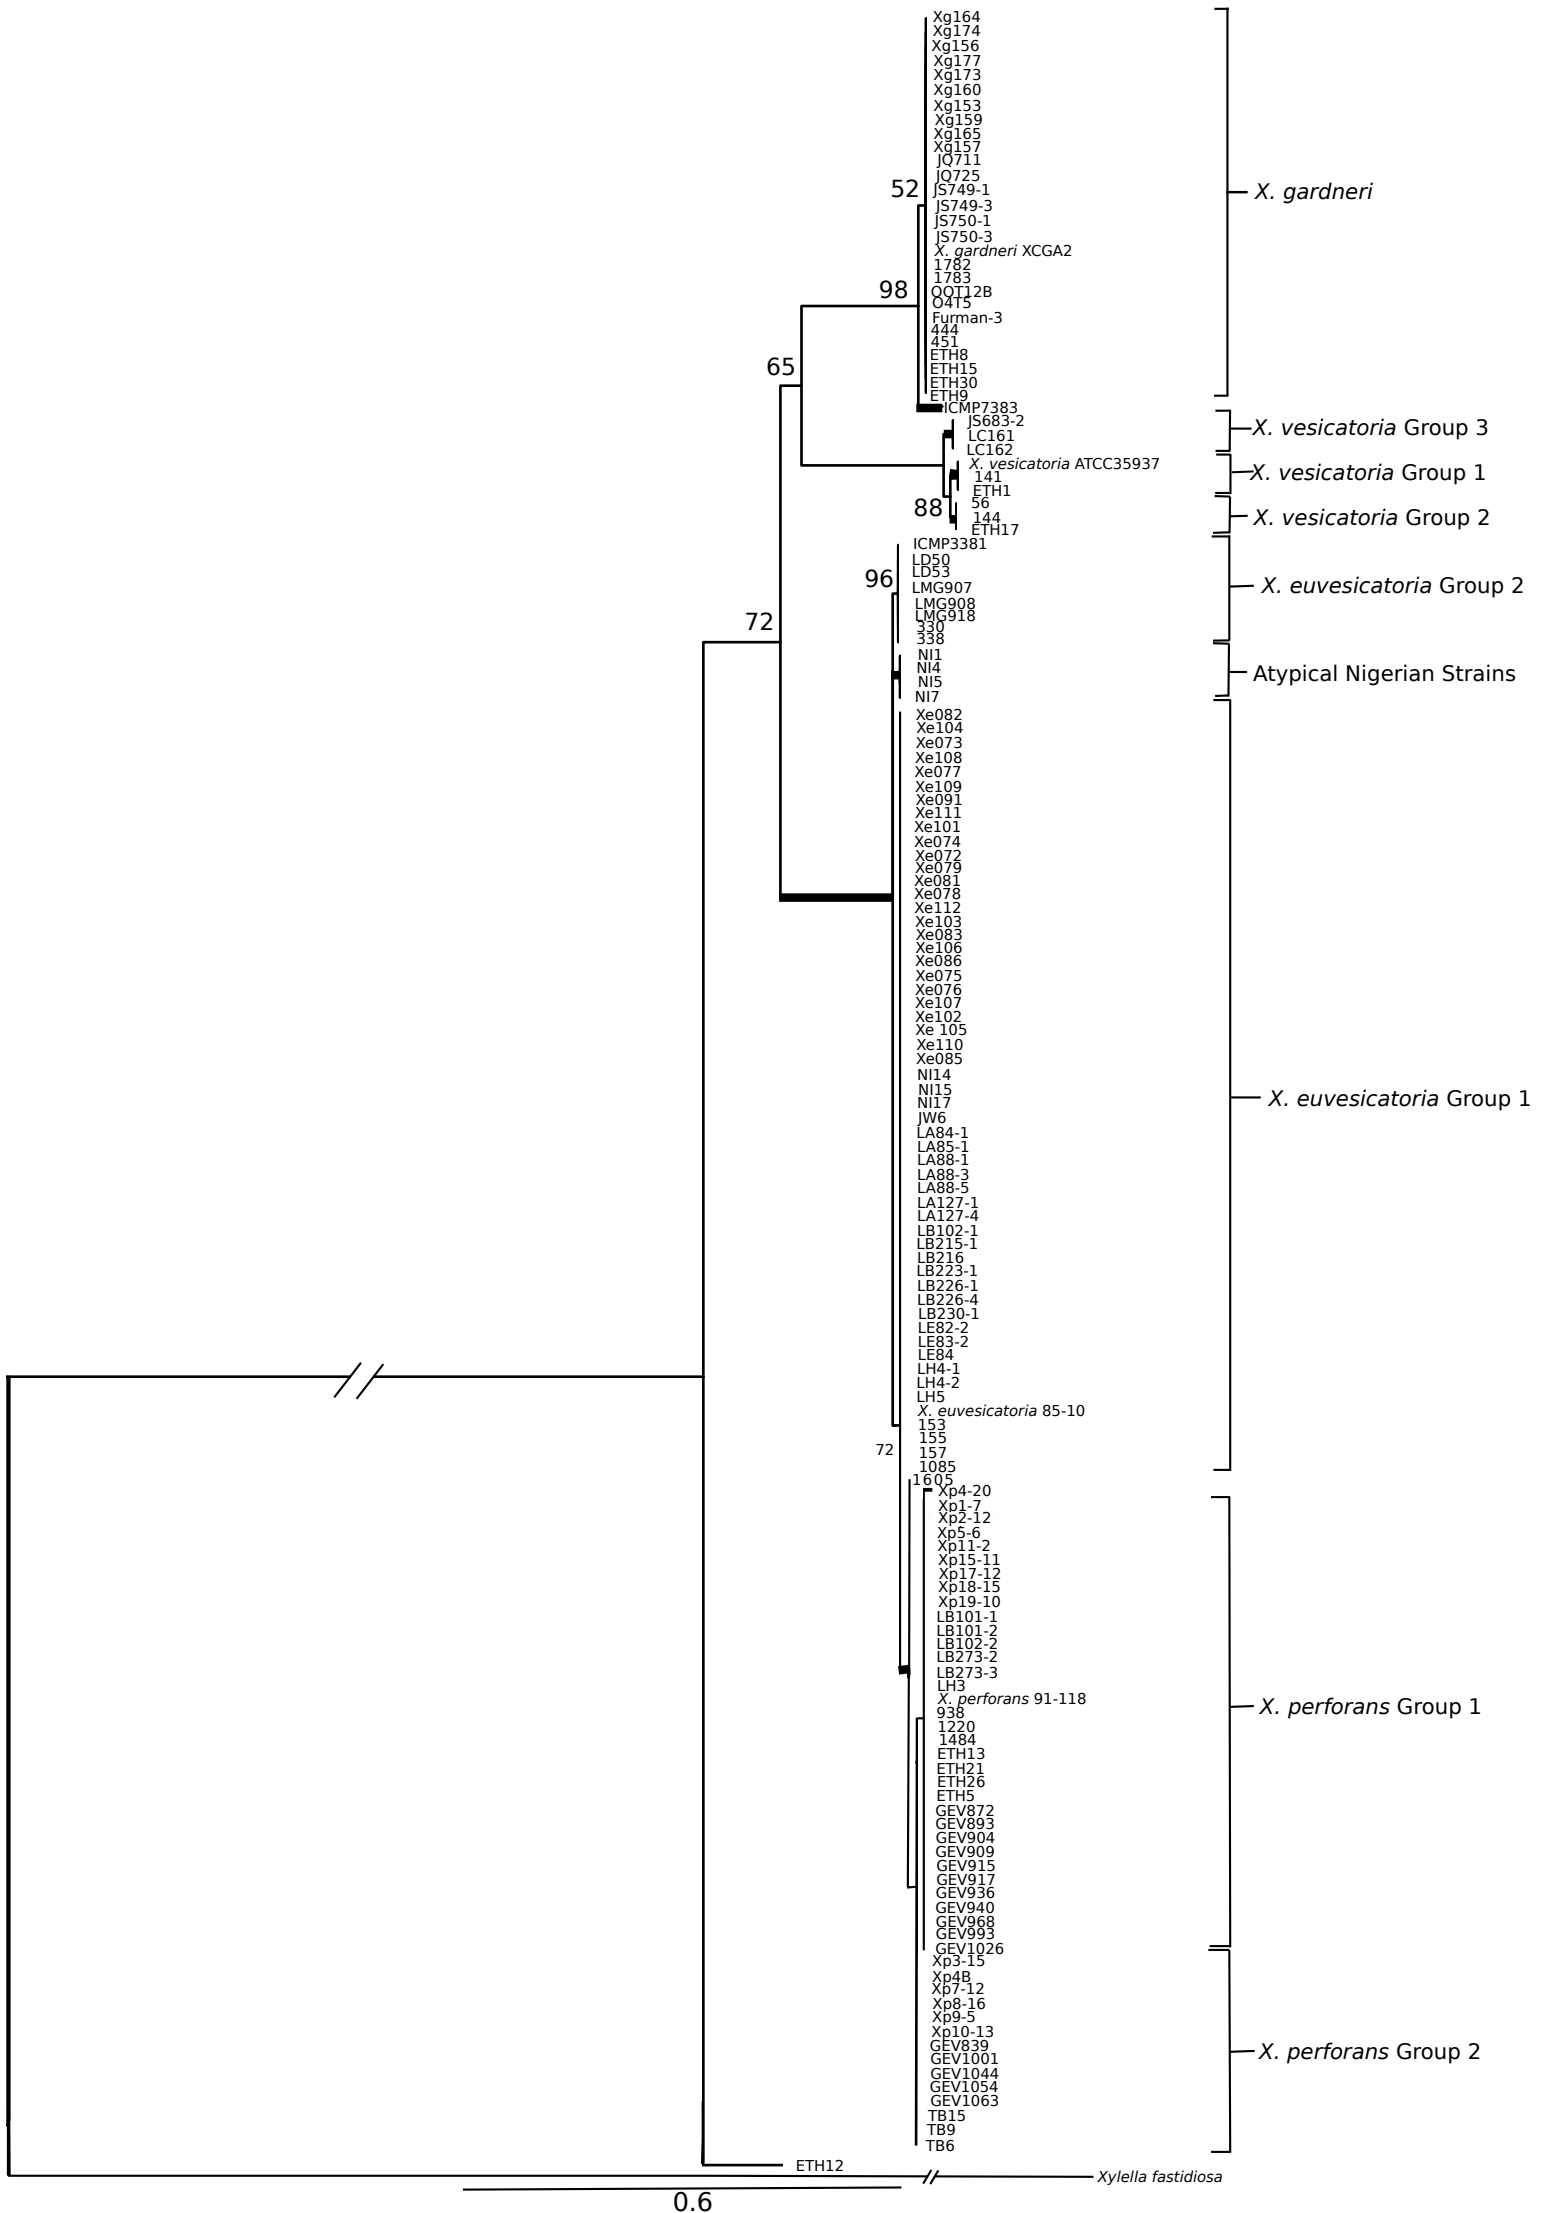

Figure S1: Phylogenetic distribution using six housekeeping genes from *Xanthomonas* causing bacterial spot in tomato and pepper.

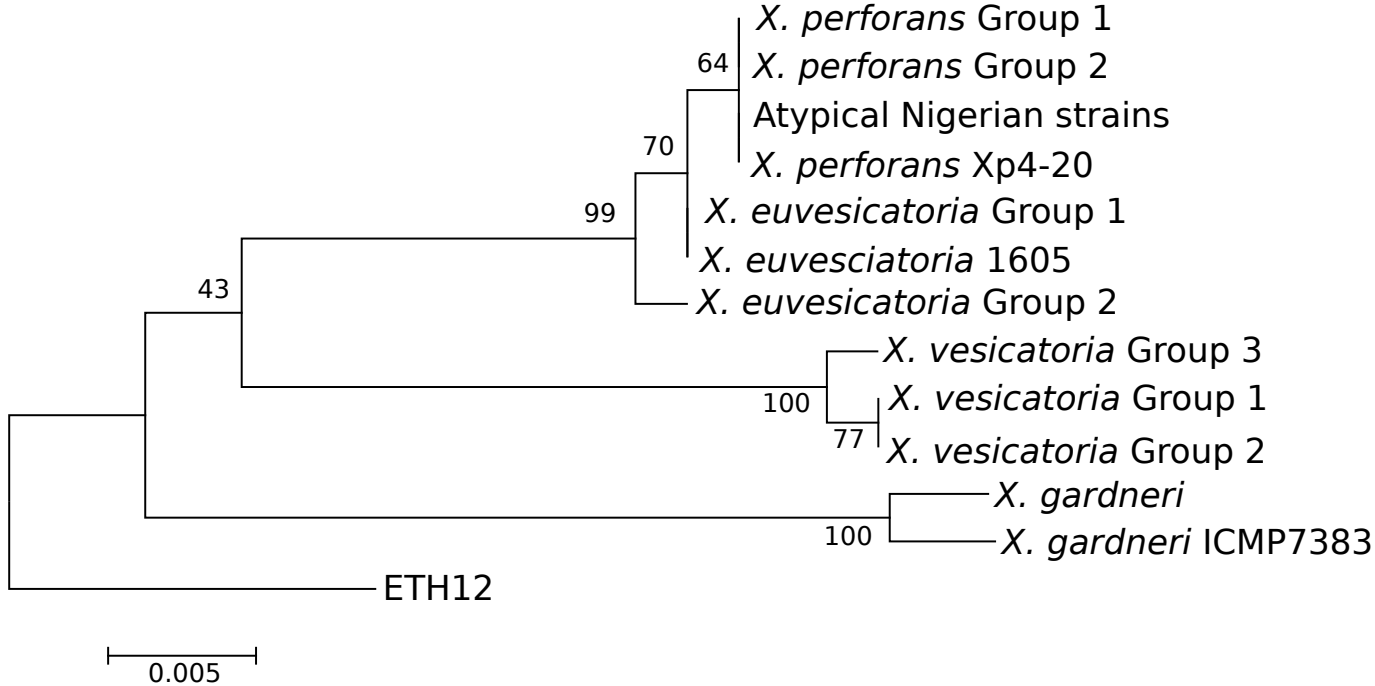

Figure S2-A: Maximum likelihood phylogenetic distribution of clone corrected *Xanthomonas* strains using *fusA* gene

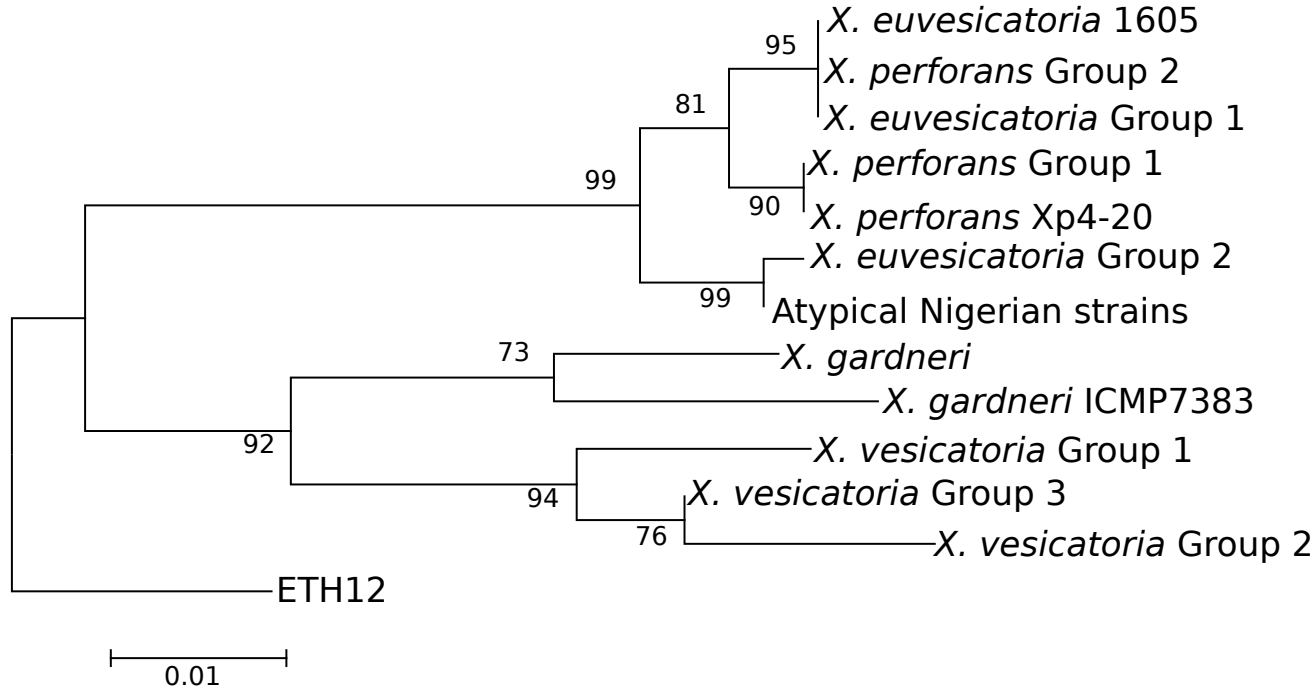

Figure S2-B: Maximum likelihood phylogenetic distribution of clone corrected *Xanthomonas* strains using *gapA* gene

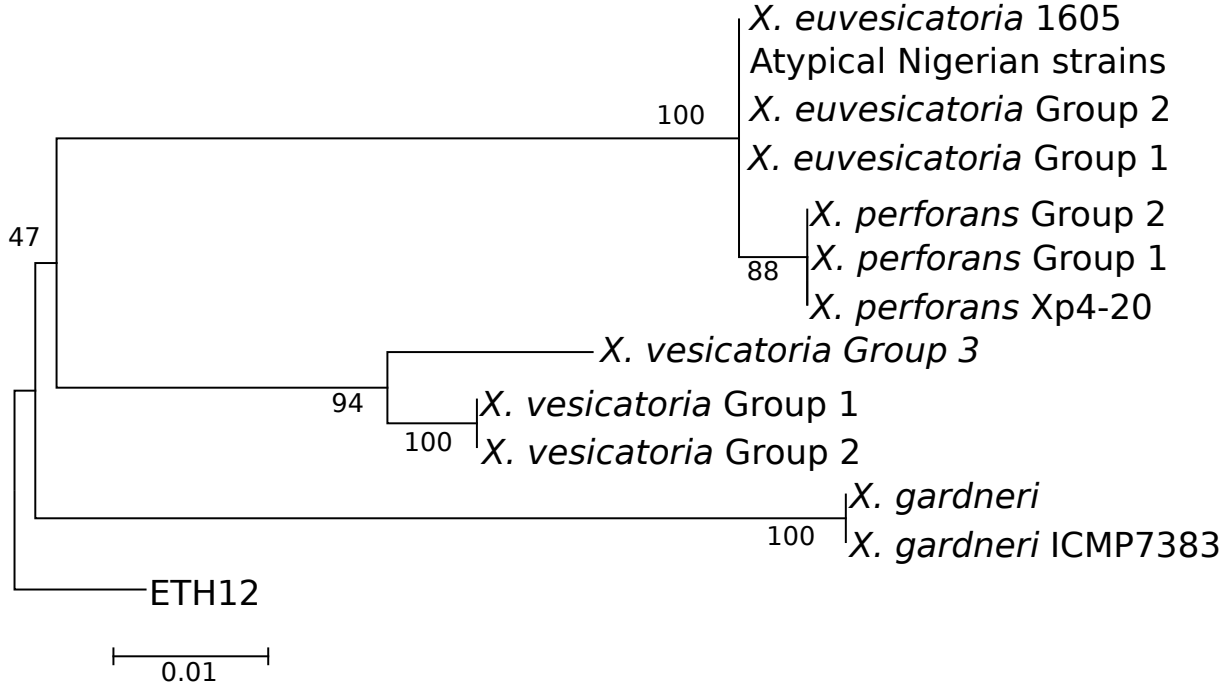

Figure S2-C: Maximum likelihood phylogenetic distribution of clone corrected *Xanthomonas* strains using *gltA* gene

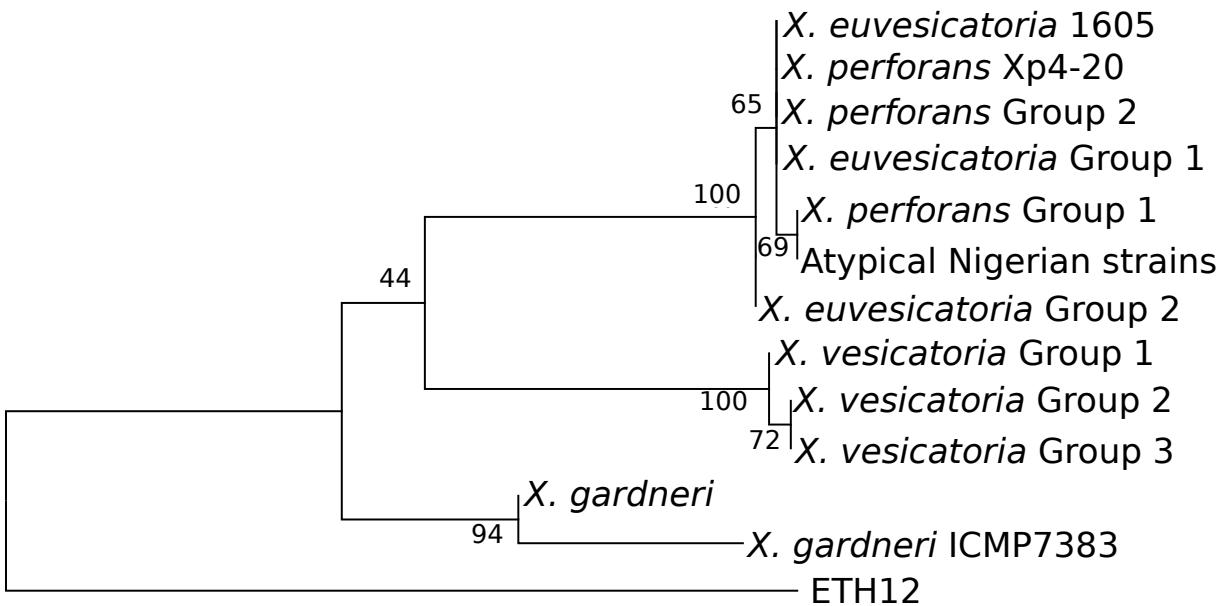

Figure S2-D: Maximum likelihood phylogenetic distribution of clone corrected *Xanthomonas* strains using *gyrB* gene

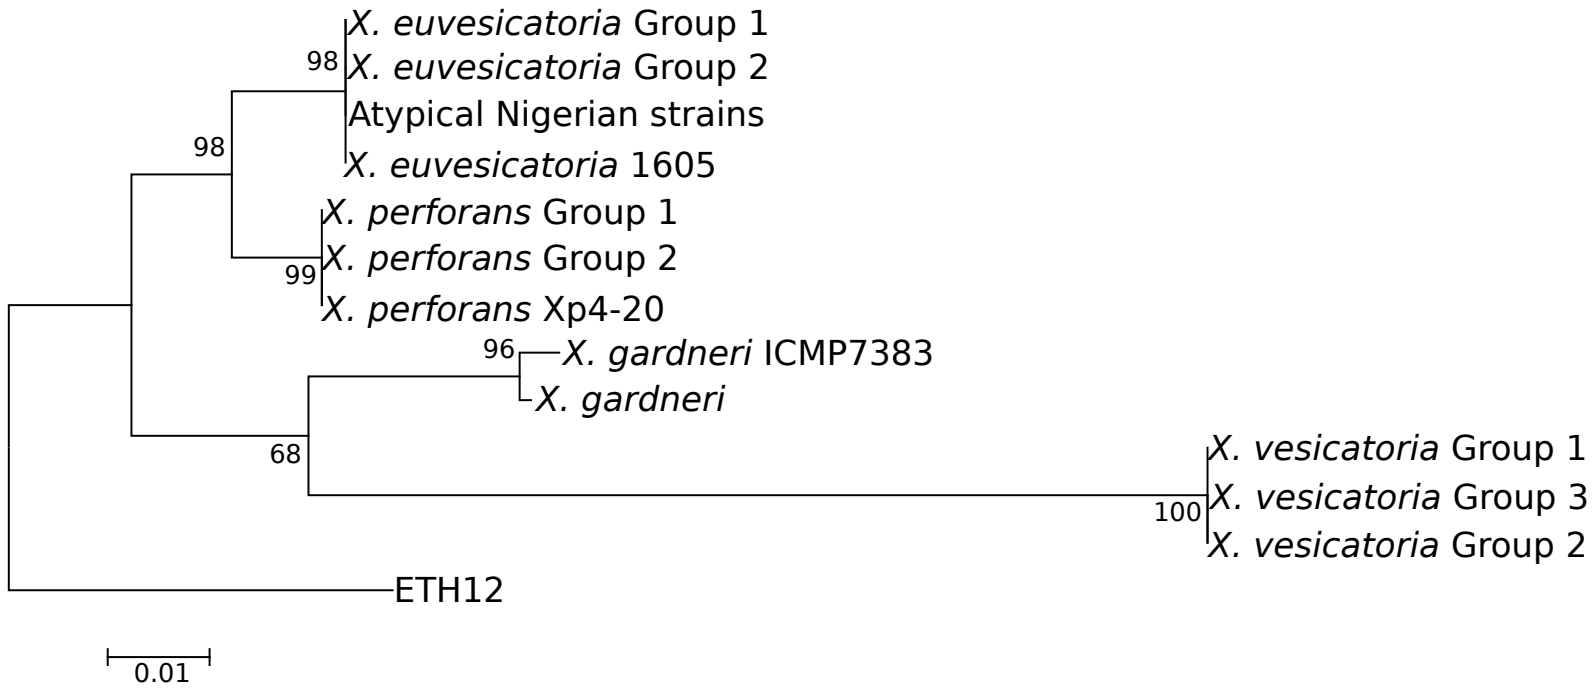

Figure S2-E: Maximum likelihood phylogenetic distribution of clone corrected *Xanthomonas* strain using *lacF* gene

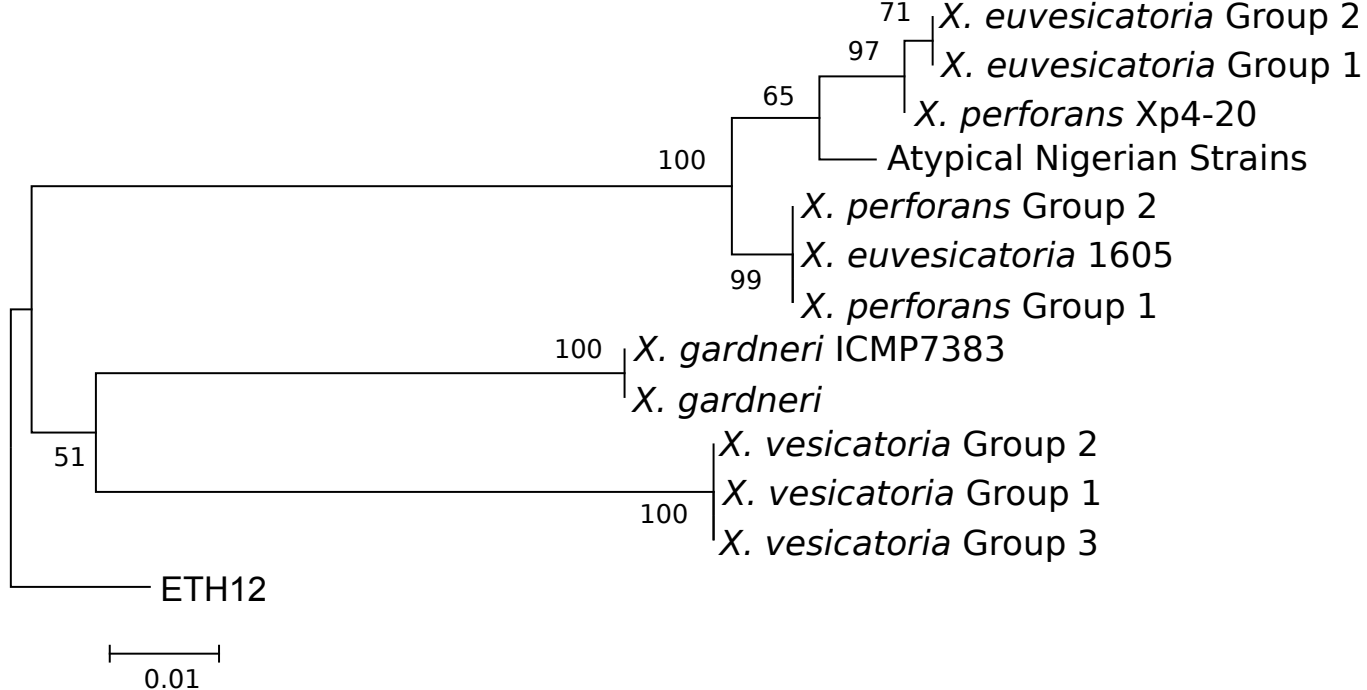

Figure S2-F: Maximum likelihood phylogenetic distribution of clone corrected *Xanthomonas* strains using *lepA* gene
